# Supplementary material
Source: publisher site journal article supplement (https://www.dovepress.com/article/485263)
Supplement: Supplementary file 1 [file get_supplementary_file.php]

**Supplementary Table 1** Domains,items and reporting frequencies extracted from systematic literature review.

| **Domain** | **Item** | **Reporting frequency** |
| --- | --- | --- |
| Symptom | Pain | 1900 |
| Fatigue | 772 |
| Nausea/Vomiting | 335 |
| Dyspnea | 247 |
| Stiff | 193 |
| Edema | 154 |
| Thirst | 64 |
| Alopecia | 53 |
| Limb weakness | 50 |
| Dizziness | 40 |
| Pruritus | 38 |
| Cough | 35 |
| Shiver | 32 |
| Hypogeusia | 30 |
| Dysphonia | 35 |
| Weight loss | 29 |
| Limb numb | 25 |
| Dysphagia | 18 |
| Weakness | 14 |
| Jaundice | 5 |
| Convulsion | 4 |
| Hoarseness | 4 |
| Blurred vision | 2 |
| Palpitation | 2 |
| Physiological function | Daliy life | 1445 |
| Self-care | 1265 |
| Sleep quality | 497 |
| Neurological function | 325 |
| Defecation function | 315 |
| Digestive function | 243 |
| Sexual function | 237 |
| Eat/Drink | 173 |
| Urinary function | 170 |
| Mastication | 4 |
| Reading | 8 |
| Hearing | 1 |
| Psychological function | Mood | 1208 |
| Body image | 100 |
| Comfort | 91 |
| Self-experience | 84 |
| Get medical support | 30 |
| Role | Social life | 1357 |
| Family life | 958 |
| General task | 166 |
| Personality | 1 |
| Overall assessment | Health status | 652 |
| Satisfaction | 191 |
| Severity of illness | 117 |
| Quality of life | 108 |
| Income | 18 |

**Supplementary Table 2** Domains,items and reporting frequencies extracted from patient interview.

| **Domain** | **Item** | **Reporting frequency** |
| --- | --- | --- |
| Symptom | Pain | 75 |
| Nausea/Vomiting | 21 |
| Coughing/Expectoration | 8 |
| Dizziness | 7 |
| Drainage tube discomfort | 4 |
| Dyspnea | 4 |
| Hoarseness | 3 |
| Limb numb | 3 |
| Dry eye | 1 |
| Tinnitus | 1 |
| Palpitation | 1 |
| Physiological function | Self-care | 56 |
| Sleep quality | 48 |
| Vitality | 21 |
| Appetite | 19 |
| Digestive function | 18 |
| Defecation function | 14 |
| Daily life | 14 |
| Memory | 1 |
| Urinary function | 1 |
| Psychological function | Mood | 7 |
| Comfort | 4 |

**Supplementary Table 3** Criterion validity of Postoperative Recovery Scale for Adult (PRSA).

| **Time point** | **Spearman correlation coefficient** | ***P*** |
| --- | --- | --- |
| Pre-op 1 | 0.780 | < 0.001 |
| POD 1 | 0.890 | < 0.001 |
| POD 7 | 0.853 | < 0.001 |
| POD 30 | 0.904 | < 0.001 |

**Notes:** Pre-op 1: preoperative day 1; POD: postoperative day

**Supplementary Table 4** PRSA scores at different time points

| **Time point** | **PRSA score** | **Difference 1 (95%CI)** | **Difference 2 (95%CI)** |
| --- | --- | --- | --- |
| Pre-op 1 | 950.0(903.8，975.0) | NA | NA |
| POD 1 | 365.0(315.0，440.0) | 557.5(540.0-572.5) * | 557.5(540.0-572.5)† |
| POD 3 | 480.0(415.0，541.3) | 107.5(95.0-117.5)* | 452.5(432.5-470.0)† |
| POD 5 | 570.0(507.5，636.3) | 90.0(80.0-102.5)* | 352.5(330.0-372.5)† |
| POD 7 | 645.0(575.0，751.3) | 75.0(65.0-85.0)* | 272.5(250.0-292.5)† |
| POD 30 | 855.0(792.5，925.0) | 180.0(162.5-195.0)* | 82.5(65.0-100.0)† |
| POD 60 | 920.0(884.5，956.3) | 65.0(57.5-75.0)* | 17.5(5.0-27.5) |

**Notes:** (*) indicates that *P* < 0.005; (†) indicates that *P* < 0.001. PRSA scores are presented as the median and quartile values. Difference 1 indicates the absolute difference in PRSA scores between two adjacent follow-up days. Difference 2 indicates the absolute difference in PRSA scores between each postoperative day and preoperative day 1. Pre-op 1: preoperative day 1; POD: postoperative day; NA: Not applicable.
